#### AUTHOR CORRECTION

Toscano A, Pancaro C, Peduto VA: Scopolamine prevents dreams during general anesthesia. *ANESTHESIOLOGY* 2007; 106:952-5

In the article that appeared on page 952 of the May 2007 issue, in the first paragraph of the article, the sentence "A 20,000-patient multicenter study reported a marked variability in the incidence of dreaming ranging from 1.1% to 10.7% of the population studied.<sup>2</sup>" should have referred to the following reference:

Sebel PS, Bowdle TA, Ghoneim MM, Rampil IJ, Padilla RE, Gan TJ, Domino KB: The incidence of awareness during anesthesia: A Multicenter United States study. *Anesth Analg* 2004; 99:833-9
